# 1 **Antimicrobial resistance in dairy slurry tanks: a critical** 2 **point for measurement and control**

## 3 AUTHORS

4 Michelle Baker\*<sup>1,2</sup>, Alexander D Williams\*<sup>1</sup>, Steven P.T. Hooton\*<sup>1,3</sup>, Richard  
5 Helliwell\*<sup>4,5,6</sup>, Elizabeth King\*<sup>1</sup>, Thomas Dodsworth\*<sup>1,7</sup>, Rosa María Baena-Nogueras\*<sup>8</sup>,  
6 Andrew Warry<sup>9</sup>, Catherine A. Ortori<sup>10</sup>, Henry Todman<sup>1,11</sup>, Charlotte J. Gray-  
7 Hammerton<sup>1,12</sup>, Alexander C. W. Pritchard<sup>1</sup>, Ethan Iles<sup>1</sup>, Ryan Cook<sup>2</sup>, Richard D. Emes<sup>2</sup>,  
8 Michael A Jones<sup>2</sup>, Theodore Kypraios<sup>11</sup>, Helen West<sup>1</sup>, David A Barrett<sup>10</sup>, Stephen J  
9 Ramsden<sup>1</sup>, Rachel L Gomes<sup>8</sup>, Chris Hudson<sup>2</sup>, Andrew D Millard<sup>3</sup>, Sujatha Raman<sup>4,13</sup>, Carol  
10 Morris<sup>5</sup>, Christine E R Dodd<sup>1</sup>, Jan-Ulrich Kreft<sup>14</sup>, Jon L Hobman<sup>1</sup> and Dov J Stekel\*\*<sup>1,15</sup>

- 11 1. School of Biosciences, University of Nottingham, Sutton Bonington Campus,  
12 Loughborough, Leicestershire, LE12 5RD, UK
- 13 2. School of Veterinary Medicine and Science, University of Nottingham, Sutton  
14 Bonington Campus, Loughborough, Leicestershire, LE12 5RD, UK
- 15 3. Department of Genetics and Genome Biology, University of Leicester, University  
16 Road, Leicester, LE1 7RH, UK
- 17 4. School of Sociology and Social Policy, University of Nottingham, University Park  
18 Campus, Nottingham, NG7 2RD, UK
- 19 5. School of Geography, University of Nottingham, University Park Campus,  
20 Nottingham, NG7 2RD, UK
- 21 6. Rurális, University Centre Dragvoll, N—7491, Trondheim, Norway
- 22 7. ResChem Analytical Ltd, 8 Jubilee Parkway, Jubilee Business Park, Stores Road,  
23 Derby, DE21 4BJ, UK
- 24 8. Department of Chemical and Environmental Engineering, University of  
25 Nottingham, University Park Campus, Nottingham, NG7 2RD, UK

- 26 9. Advanced Data Analysis Centre, University of Nottingham, Sutton Bonington  
27 Campus, Loughborough, Leicestershire, LE12 5RD, UK
- 28 10. School of Pharmacy, University of Nottingham, University Park Campus,  
29 Nottingham, NG7 2RD, UK
- 30 11. School of Mathematical Sciences, University of Nottingham, University Park  
31 Campus, Nottingham, NG7 2RD, UK
- 32 12. Department of Zoology, University of Oxford, 11a Mansfield Road, Oxford OX1  
33 3SZ, UK
- 34 13. Centre for Public Awareness of Science, Australian National University, Linnaeus  
35 Way, Acton ACT 2601, Canberra, Australia
- 36 14. School of Biosciences, University of Birmingham, Edgbaston, Birmingham, B15  
37 2TT
- 38 15. Department of Mathematics and Applied Mathematics, University of  
39 Johannesburg, Aukland Park Kingsway Campus, Rossmore, Johannesburg

40

41 \* These authors have contributed equally to this paper

42 \*\* To whom correspondence should be addressed: [dov.stekel@nottingham.ac.uk](mailto:dov.stekel@nottingham.ac.uk)

43

## 44 Abstract

45 Waste from dairy production is one of the world's largest sources of contamination from  
46 antimicrobial resistant bacteria (ARB) and genes (ARGs). However, studies to date do  
47 not provide necessary evidence to inform antimicrobial resistance (AMR)  
48 countermeasures. We undertook a detailed, interdisciplinary, longitudinal analysis of  
49 dairy slurry waste. The slurry contained a population of ARB and ARGs, with resistances  
50 to current, historical and never-used on-farm antibiotics; resistances were associated  
51 with Gram-negative and Gram-positive bacteria and mobile elements (*ISEcp1*, *Tn916*,  
52 *Tn21*-family transposons). Modelling and experimental work suggested that these  
53 populations are in dynamic equilibrium, with microbial death balanced by fresh input.  
54 Consequently, storing slurry without further waste input for at least 60 days was  
55 predicted to reduce ARB spread onto land, with >99% reduction in cephalosporin  
56 resistant *Escherichia coli*. The model also indicated that for farms with low antibiotic use,  
57 further reductions are unlikely to reduce AMR further. We conclude that the slurry tank is  
58 a critical point for prevalence and control of AMR, and that measures to limit the spread  
59 of AMR from dairy waste should combine responsible antibiotic use, including low total  
60 quantity, avoidance of human critical antibiotics, and choosing antibiotics with shorter  
61 half-lives, coupled with appropriate slurry storage.

62

## 63 Introduction

64 Antibiotics provided to food-producing animals account for 73% of global antibiotic sales  
65 (1), prompting concerns about the selection of antibiotic resistance bacteria (ARB) and  
66 genes (ARGs), and their migration from livestock and their environment to humans. ARB  
67 and ARGs associated with livestock can enter humans through consumption of animal  
68 products, e.g. contaminated meat (2, 3) and dairy (4, 5), or more indirectly, e.g.  
69 through land-application of animal waste, which may subsequently infiltrate crops (6, 7)  
70 and connected water resources (8, 9).

71 Cattle production comprises 50% of global Livestock Standard Units (10), so has  
72 considerable environmental impacts that need to be mitigated (11). There are  
73 approximately 265 million dairy cows globally, producing high volumes of waste manure,  
74 estimated at 3 billion tonnes per year ([www.faostat.org](http://www.faostat.org)). In the UK, the site of this  
75 study, dairy farms are estimated to account for 80% (67 million tonnes) of total annual  
76 livestock manure production (12), with more cattle waste material applied to soil in  
77 England and Wales than swine and poultry combined (13).

78 Antibiotics are routinely administered to dairy cattle for treatment, and, in some cases,  
79 prevention of common illnesses, including mastitis and respiratory disease (14-16).  
80 Lameness, the most costly disease to UK dairy farms (17), is often prevented with  
81 application of antimicrobial metals (copper, zinc) or other chemicals (formalin,  
82 glutaraldehyde) in the form of footbaths (18), known to co-select for antibiotic resistance  
83 (19, 20). Dairy waste can therefore contain selective and co-selective pressures in the  
84 form of mixtures of antibiotics and assorted antimicrobials, as well as ARB, including  
85 [Extended Spectrum Cephalosporin-Resistant \(ESC-R\) \*E. coli\*](#) (21, 22), and genetic  
86 resistance determinants (23, 24). Thus, dairy waste may represent one of the world's  
87 [most substantial routes for AMR to enter the environment, including onto fields and](#)  
88 [grasslands used for food production and into water ways.](#)

89

90 To limit the risks of AMR, many countries have introduced responsible use policies,  
91 including reducing overall agricultural use of antibiotics (25), or of human critical  
92 antibiotics, including 3<sup>rd</sup>/4<sup>th</sup> generation cephalosporins (26). However, antibiotics and  
93 other antimicrobials remain necessary for safeguarding animal health and welfare. Thus,  
94 other countermeasures are also needed to reduce the transmission or prevalence of ARB  
95 and ARGs from dairy waste into the environment. For example, current UK guidelines  
96 suggest that storage of solid manure and slurry without fresh input for three months can  
97 ameliorate AMR risk (27), but no evidence is provided. Slurry storage is essential in the  
98 UK and other countries where dairy cows are housed indoors for large parts of the year,

99 and where slurry cannot be spread onto land that is frozen or deemed nitrate vulnerable.  
100 Two European studies have assessed storage effects on dairy manure, finding that  
101 certain ARGs increased during storage (28, 29); however, this 'stored' effluent regularly  
102 received fresh input. Contrastingly, a survey of several US dairy farms evaluating a  
103 different set of ARGs did not detect clear storage effects on ARG abundancesHurst,  
104 Oliver (30).

105 Other dairy waste studies took a 'snapshot in time' (31-34), which does not allow for  
106 assessment of temporal stability of the resistome and the influence of storage. Factors  
107 such as temperature also influence the prevalence of enteric pathogens, indicator  
108 organisms and resistance phenotypes during manure storage (35-39). Meanwhile,  
109 studies assessing how cattle faecal resistomes respond to contrasting antibiotic  
110 management practices generally place emphasis on individual cattle (40-42), with  
111 different microbiomes, rather than the collective faecal output of the herd. Liquid-solid  
112 separation of manure may also influence the persistence of AMR (43).Therefore, there is  
113 a need for detailed longitudinal studies of AMR in dairy slurry and potential mitigations.

114

115 This study assessed three key questions about AMR in slurry and its relationship to  
116 antibiotic use and slurry storage: (1) does the slurry tank select for or against AMR; (2)  
117 how does the resistance content of the slurry tank relate to altered patterns of farm  
118 antibiotic use; and (3) can slurry storage help reduce AMR in slurry before application to  
119 land? Our interdisciplinary approach combined phenotypic, genomic, and metagenomic  
120 microbiological analyses with chemical analyses, antibiotic use records and predictive  
121 mathematical models, to provide a temporal evaluation of slurry tank content over six  
122 months. This was supplemented by concurrent mini-slurry tank experiments which  
123 facilitated the controlled study of isolated slurry. We designed the mathematical model  
124 to enable us to study the impact of farm practices that would be impractical or unethical  
125 to perform through purely empirical approaches. These included major changes to farm  
126 slurry handling, antibiotic reduction to a level that would threaten animal welfare, or the

127 reintroduction of use of human critical 3<sup>rd</sup> or 4<sup>th</sup> generation cephalosporins. Thus, this  
128 study enables the identification of approaches to reduce the spread of AMR into the  
129 environment from an important source of such contamination.

130

## 131 **Methods**

### 132 *Sample site*

133 We surveyed a mid-sized, high performance commercial dairy farm in England, housing  
134 ~200 milking Holstein Friesian cattle at the time of study. Practice at this farm is typical  
135 of management methods at high-performance dairy farms, although all farms vary.  
136 Milking cattle are housed indoors on concrete, and all excreta are regularly removed  
137 from cattle yards by automatic scrapers into a drainage system terminating at the  
138 3000m<sup>3</sup> slurry tank. The drainage system also receives used cleaning materials and  
139 wash water, used footbath containing zinc and copper, waste milk from cows treated  
140 with antibiotics, and rainwater runoff. An automated screw press (Bauer S655 slurry  
141 separator with sieve size 0.75 mm; Bauer GmbH, Voitsberg, Austria) performs liquid-  
142 solid separation prior to the slurry tank. Liquids enter the slurry tank semi-continuously,  
143 while solids are removed to a muck heap. Calves, dry cows, and heifers are housed  
144 separately from the milking cows. Faeces and urine from calves drain into the common  
145 drainage system, whilst dirty straw from calf housing is taken directly to the muck heap.  
146 Excess slurry can be pumped to an 8000m<sup>3</sup> lagoon for long term storage. Slurry from  
147 either the slurry tank or lagoon is used to fertilise grassland and arable fields.

148

### 149 *Microbiological sampling, strain isolation, antimicrobial susceptibility* 150 *testing and whole genome sequencing*

151 Liquid samples were collected from the slurry tank on 17 dates between May and  
152 November 2017 (Table S1). *Escherichia coli* strains were isolated using Tryptone Bile X-

153 Glucuronide (TBX) or MacConkey agar or TBX/MacConkey supplemented with 16  $\mu\text{g ml}^{-1}$   
154 ampicillin (AMP), or 2  $\mu\text{g ml}^{-1}$  cefotaxime (CTX); or on CHROMagar ESBL™ agar. Putative  
155 *E. coli* isolates were subcultured onto TBX agar or TBX agar supplemented with 2  $\mu\text{g ml}^{-1}$   
156 CTX. *E. coli* strains were confirmed using oxidase (22) and catalase tests. Antimicrobial  
157 susceptibility testing (AST) using a range of antibiotic discs (Table S2) was carried out  
158 on 811 *E. coli* isolates in accordance with CLSI (44) guidelines. ESC-R *E. coli* strains  
159 were identified by phenotypic resistance profile as putatively *ampC* or CTX type, and  
160 confirmed by PCR (22). Presence of Tn21-like mercury resistance transposons within the  
161 *E. coli* isolates was initially screened for by growing isolates on LB agar containing 25  $\mu\text{g}$   
162  $\text{ml}^{-1}$   $\text{HgCl}_2$ . Their presence was confirmed by PCR (45). Genome assembly of selected  
163 ESC-R and mercury resistant *E. coli* strains using PacBio, was carried out by the Centre  
164 for Genomic Research (CGR), University of Liverpool, with methods for library preparation and  
165 sequencing as previously described (46) or by Illumina short read WGS by MicrobesNG  
166 (University of Birmingham, UK). Genome sequence analysis and annotation was  
167 conducted using Prokka (47), CSARweb (48), Snapgene viewer (Insightful Science;  
168 [snapgene.com](http://snapgene.com)), Res Finder (49) and Plasmid Finder (50). Genome sequences are  
169 deposited with NCBI under BioProject PRJNA736866.

170

## 171 *Metagenomics Sample collection and DNA extraction*

172

### 173 *Main tank Sample Collection*

174 Samples were collected from the slurry tank monthly between June and October 2017,  
175 using a clean stainless steel bucket, and aliquoted into 2 large glass bottles with external  
176 PE protection. Three replicate extractions were performed on 250  $\mu\text{l}$  of each sample  
177 using a PowerFecal Kit (Qiagen), according to manufacturer's instructions (15 extractions  
178 in total). DNA was quantified using a Qubit fluorometer (Invitrogen) while quality was  
179 assessed via Nanodrop 1000 (ThermoFisher). Extracted DNA was stored at 4°C pending  
180 sequencing.

181

### 182 *Mini-Tank Experiments*

183 Miniaturised experimental slurry tanks were set up to assess the impact of storing slurry  
184 (control tanks) and to measure antibiotic stability. Twelve mini-tanks were situated on  
185 the farm from 23/4/2018 to 15/6/2018 at ambient temperature (mean 24 hour  
186 temperature in liquid ranged between 7° to 17°), protected from rain and direct sunlight,  
187 and containing 10L grab samples of slurry from the surface of the main slurry tank. Six  
188 different conditions were tested in duplicate (all amounts per litre): control; + SSD  
189 (0.2mL of slurry solids homogenised by stomacher, including 67 CFU of CTX-resistant *E.*  
190 *coli*); + SSD + 3µg cefquinome weekly addition; + SSD + 40µg cefalexin weekly  
191 addition; + SSD + 16.8g of footbath mix (Cu + Zn); + SSD + footbath + cefquinome).  
192 Mini-tanks were sampled four times (0, 2, 4 and 7 weeks after initial filling).  
193 Experimental conditions were mainly used for model calibration (Supplementary Text 1).  
194 *E. coli* were isolated and cultured as described above except MacConkey agar was not  
195 used. DNA was extracted and processed for sequencing as above. Antibiotic  
196 concentrations were measured as described previously Baena-Nogueras, Ortori (51) with  
197 further methods described in Supplementary Text 3.

198

### 199 *Metagenomic Sequencing, Assembly and Analysis*

200 Metagenomic sequencing of DNA extracted from the main slurry tank was performed by  
201 Liverpool Genomics using the Illumina HiSeq platform, and from the mini-slurry tanks by  
202 Edinburgh Genomics using the Illumina NovaSeq platform (150 bp paired end libraries in  
203 both cases). For the main tank, reads were trimmed with Cutadapt v1.2.1 (52) and  
204 Sickle v1.2.0.0 (53), while mini-tank reads were trimmed with Fastp v0.19.07 (54).  
205 Assembly was performed on trimmed reads using Megahit v1.1.3 (55). Main tank  
206 technical replicates were pooled by date and assembled using the settings: k-step 10; k-  
207 range 27-87. Mini-tank metagenomes were assembled individually (k-step ~20, k-range:  
208 21-99). Metagenome sequences are deposited with the ENA under Study Accession  
209 PRJEB38990.

210



211 Read-based searches for ARGs were performed with DeepARG v2 (56). ARGs were also  
212 identified on contigs (>1.5 kb length) in order to investigate the wider genetic context of  
213 the core resistome using ABRicate v1.0.1 (57), using MegaRes 2.0 for ARGs and metal  
214 resistance genes (MRGs) (58) (including experimentally verified MRGs; genes requiring  
215 SNP validation were excluded) and ACLAME 0.4 for MGEs (59). All data were analysed  
216 with stringencies: >60% gene coverage, >80% identity(60). Lastly, the BacMet2  
217 database (61) was screened against translated peptides (based on Prodigal (62) output)  
218 from meta-assemblies of the main and mini-tanks (stringencies: >60% sequence  
219 identity and match length >50% of peptide length).

220 Taxonomic assignment of reads was performed using Kaiju v1.6.2 (63), with default  
221 settings. The reference database used was a microbial subset of the NCBI database (64),  
222 including additional fungal and other microbial eukaryotic peptide sequences. Contigs of  
223 interest were assigned putative identities using NCBI-nucleotide BLAST (65)  
224 (MegaBlast(66), highly similar sequences).

225 For both ARG and taxonomic assignments, statistical comparisons were carried out using  
226 the DirtyGenes likelihood ratio test (67), using randomized resampling (n=1000) from  
227 the null distribution to establish p-values.

228

### 229 *Water Quality Analysis*

230 Water quality analysis was performed on the same samples as for microbiological  
231 culturing. For each sample, 2.5L was initially sampled. Probes were used to assess the  
232 pH (Hach PHC201), dissolved oxygen (Hach LDO101) and NaCl (Hach). The probe tip  
233 was rinsed in Milli-Q water (Merck), dabbed dry and submerged into the bottle  
234 containing slurry and left to equilibrate. The sample was then homogenized by shaking  
235 vigorously before decanting into a 250mL bottle for analysis using a Hach DR3900  
236 Laboratory Spectrophotometer with cuvette test kits: sulphate (LCK153); ammonium  
237 (LCK303); chloride (LCK311); copper (LCK329); LATON total nitrogen (LCK338); nitrate  
238 (LCK340); nitrite (LCK342); phosphate (LCK348); zinc (LCK360); COD (LCK514); and  
239 TOC (LCK381). Standard procedures are available from <https://uk.hach.com>.

240

## 241 *Mathematical Model*

242 A mechanistic, multi-strain model of AMR in the slurry tank was constructed to simulate  
243 a range of relevant farm management scenarios that would have been impractical or  
244 unethical to carry out empirically. In brief, it is a coupled ordinary differential equation  
245 model of bacterial populations including logistic growth, death (baseline and  
246 antimicrobial induced), horizontal transfer and fitness cost of resistance, inflow and  
247 outflow (68, 69). The model considered mobile resistance to penicillin, tetracycline,  
248 cephalixin, cefquinome, copper, and zinc, and was simulated for a full year in order to  
249 capture the recorded input of cephalixin and other antibiotics. The choice of resistances  
250 reflects our interests in ESC-R *E. coli* strains, and the risk of environmental  
251 contamination by mobile genes following slurry spreading. Full model description is  
252 provided in Supplementary Text 1, equations in Supplementary Text 2 and parameter  
253 values in Table S4. This model was deposited in BioModels (70) as MODEL1909100001.  
254 The secondary storage model is derived from this model by duplicating equations for  
255 each storage vessel (70) and also deposited as MODEL1909120002. A reduced model  
256 was used for parameter inference from mini-tank data. Model simulations were carried  
257 out in Matlab using the ode45 solver.

258

## 259 **Results**

### 260 **Resistance to antibiotics with historic, current and no documented farm use**

261 The majority of antibiotics administered to milking cows during the sampling period were  
262 aminocoumarins, aminoglycosides and beta-lactams delivered in combination, and beta-  
263 lactams and tetracyclines administered individually (Table S3). The last recorded use of  
264 sulphonamides (sulfadoxine) was in June 2016; of first generation cephalosporins  
265 (cephalexin) was in April 2017 (shortly before the start of the sampling period); of third  
266 generation cephalosporins (ceftiofur) was in January 2016; and of fourth generation  
267 cephalosporins (cefquinome) was in August 2015. Residual antibiotics or ARB associated  
268 with historical use could potentially be present in sludge at the bottom of the tank that

269 cannot be piped for spreading. Smaller quantities of antibiotics are also given to  
270 youngstock; their waste does not enter the slurry system.

271 The dominant resistance phenotypes of cultured *E. coli* isolates from the slurry tank  
272 (Figure 1a) were ampicillin (34.6%), cefpodoxime (39.3%), cefotaxime (29.6%) and  
273 streptomycin (26.5%); other common phenotypes included tetracycline (13.6%),  
274 chloramphenicol (10.7%) and nalidixic acid (9.6%). Multidrug resistant *E. coli* strains  
275 ( $\geq 3$  different antibiotic classes, Magiorakos, Srinivasan (71)) represented 37% of the  
276 cultured isolates (Figure 1b), detected in strains isolated on both antibiotic-  
277 supplemented and non-supplemented media. Of these isolates, 12 cefotaxime resistant  
278 *E. coli* strains were sequenced to characterize the resistance genes and mobile elements  
279 carrying them. Three carried *ISEcp1* CTX-M-15, additionally carrying *qnrS* and *tetM*  
280 within the *ISEcp1* element. The other sequenced ESC-R strains were chromosomal *ampC*  
281 mutants.

282 In main slurry tank metagenomes, eight resistance classes account for 98% of the ARGs  
283 identified in reads (Figure 1c): multidrug resistance genes (36.7%); tetracycline  
284 resistance genes (21.6%); macrolide-lincosamide-streptogramin (MLS) resistance genes  
285 (21.4%); aminoglycosides (7.3%); beta lactams (4.5%); peptides (4.0%); bacitracins  
286 (1.6%) and glycopeptides (1.2%). MRGs were also identified (*mer*: mercury; *cop*, *cus*,  
287 *pco/sil*: copper, copper/silver; *cad*, *czc*: cadmium, cadmium/zinc/cobalt; *ars*,  
288 arsenic/antimony; *pbr* lead resistance). In equivalent metagenome read assemblies, MLS  
289 and tetracycline ARGs were most frequently detected (70 and 46 contigs, respectively).  
290 Few MRGs were detected in main tank metagenome assemblies, limited to TCR copper  
291 resistance genes (5 contigs).

292

293 Overall, the identification of aminoglycoside, beta-lactam (excepting 3<sup>rd</sup>/4<sup>th</sup> generation  
294 cephalosporins) and tetracycline resistance genes and phenotypes reflect current or  
295 recent farm antibiotic use, while the presence of zinc and copper resistance genes reflect  
296 transition metal use. The presence of sulphonamide and cephalosporin resistance genes  
297 and phenotypes may be due to historical use, or reflect widespread environmental

298 occurrence (72). The prevalence of MLS resistance genes is unlikely to be associated  
299 with antibiotic use, as there is no recorded MLS use for milking cows.

300

### 301 **Slurry tank properties and AMR remained stable due to frequent inputs**

302 Water quality measures were largely stable (Figure 2a), with some fluctuations in July

303 and August likely to be associated with mixing of slurry in the tank prior to spreading on

304 fields. The relative contribution of the dominant drug-resistance categories listed above

305 remained unchanged throughout the sampling period (Figure 1c;  $p=0.172$ , DirtyGenes

306 test). Likewise, taxonomic analyses of read data showed the time-stable dominance of

307 six bacterial phyla with at least 1% prevalence (Figure 2b;  $p=0.254$ , DirtyGenes test):

308 Bacteroidetes (13.8%), Firmicutes (13.7%), Proteobacteria (4.7%), Spirochaetes

309 (2.9%), Euryarchaeota (1.9%) and Tenericutes (1.4%). These phyla only account for

310 38% of the microbial community: there is considerable diversity in the tank with 178

311 phyla identified (Table S4).

312 The overall numbers of *E. coli* identified through culture-based enumeration also

313 remained stable (Figure 2c), with concentrations of  $4.23 \pm 0.40$  ( $\text{Log}_{10}$  CFU  $\text{mL}^{-1}$ ) on TBX

314 plates and  $4.29 \pm 0.46$  ( $\text{Log}_{10}$  CFU  $\text{mL}^{-1}$ ) on MacConkey media. *E. coli* strains resistant to

315 ampicillin (TBX/Amp  $16 \mu\text{g mL}^{-1}$ ) were stable at concentrations of  $3.99 \pm 0.43$  ( $\text{Log}_{10}$  CFU

316  $\text{mL}^{-1}$ ), i.e.  $\sim 58\%$  of cultured *E. coli* strains. *E. coli* that could be cultured on cefotaxime

317 selective plates (TBX/CTX  $2 \mu\text{g L}^{-1}$ ) were detected on only five of 17 sampling dates, with

318 counts below 10 colonies per plate on all but one day (22<sup>nd</sup> August). Thus, cefotaxime

319 resistant *E. coli* were present at low levels, but could not be reliably quantified. The full

320 AST profiles of the 811 isolates also show consistency over time, with some random

321 variation, both on antibiotic-free and antibiotic-supplemented media (Figure 3).

322

### 323 **Model predictions are consistent with microbial data**

324 In the mathematical model, predicted resistance to penicillins fluctuated between 0.4%

325 and 6.4% and cephalosporins between 0.5% and 7.9% (Figure 4a), i.e. both present but

326 low, despite frequent inflow of antibiotics into the tank (Figure 4b). Resistance to

327 tetracycline increased from low initial levels to fluctuate around ~25% of the *E. coli*  
328 population (Figure 4a), before slowly declining over the longer term, reflecting the  
329 decline in tetracycline use later in the year. These predicted levels of tetracycline and  
330 cephalosporin resistances are concordant with the empirical phenotype above. Penicillin  
331 resistance in the model is lower than observed empirically, probably because resistance  
332 in the model is plasmid-borne, while many strains have chromosomal mutations of *ampC*  
333 or chromosomally located resistance genes that could be mobilised (e.g. *ISEcp1CTX-M-*  
334 *15* elements). The model predicts that zinc resistance is highly prevalent, rising to  
335 fluctuate around 80%, with co-occurrence of tetracycline and zinc resistance, typically  
336 fluctuating between 10 and 15%, consistent with predictions that the metal  
337 concentrations in the tank are co-selective (69).

### 338 **Associations of ARGs with other ARGs, integrons and Gram-positive taxa**

339 Several metagenome contigs contained two or more ARGs, MRGs or associations with  
340 MGE markers in both the main tank (37 contigs) and mini-tank metagenome assemblies  
341 (101 contigs) (Figures S1 and S2). These include ARGs belonging to the same resistance  
342 gene group, e.g. *aph3* and *aph6* (both aminoglycoside resistance genes; Figure S3a)  
343 which were co-localised on five main-tank and eight mini-tank contigs; as well as genes  
344 associated with entirely different antibiotic resistance classes, e.g. *ant6* and *tet44*  
345 (aminoglycoside and tetracycline resistance, respectively; Figure S3b) were co-localised  
346 on two main-tank and eight mini-tank contigs. In other mini-tank contigs, *aph3-aph6*  
347 were additionally co-resident with either a sulphonamide (*su12*, 1 contig) or tetracycline  
348 (*tetY*, 1 contig) resistance gene. *tetM* was embedded within the widely documented  
349 Tn916 transposon (18 *tetM* contigs in total, nine of which were linked with Tn916  
350 elements). The two largest Tn916-like contigs (18.3-18.9 kb) appear to be carried within  
351 Gram-positive bacteria, possibly *Streptococcus* spp. or *Enterococcus* spp. (NCBI-BLAST,  
352 ~99.96% identity, ~91% query coverage; Figure S3c). Furthermore, 21.4% (n= 6/28)  
353 of main and mini-tank contigs containing *cfxA* (class-A beta-lactamase) were co-localised  
354 with mobile elements.

355 Further identification of mobile resistance cassettes was through a screen of all *E. coli*  
356 strains for phenotypic mercury resistance as a marker for Tn21 carriage. Sequence  
357 analysis of mercury resistant *E. coli* strains showed that three carried Tn21 variants  
358 carrying the integron intI2 conferring co-occurrence of combinations of penicillin,  
359 sulphonamide, aminoglycoside and quaternary ammonium compound resistances.

### 360 **Waste management for AMR reduction**

361 We investigated the use of slurry storage to ameliorate resistance through a combination  
362 of empirical and modelling work. In the mini-tanks, we found that storage of slurry  
363 without inflow rapidly decreased the total concentration of cultured *E. coli* cells (Figure  
364 S6a), as well as *Escherichia*, *Pseudomonas* and *Klebsiella* spp. sequences identified by  
365 metagenomics (Figure 5). Reads assigned to gut-associated anaerobes belonging to  
366 Bacteroidetes including *Bacteroides* spp., *Alistipes* spp. and *Prevotella* spp. declined in  
367 steps. In contrast, the relative abundance of *Acinetobacter* spp. gradually increased until  
368 week four, before declining again by the end of the experiment (Figure 5).

369 The prevalence of beta-lactam resistance genes declined considerably in <2 weeks  
370 (Figure 6a). The overall relative abundance of tetracycline resistance genes declined  
371 marginally over 7-weeks of storage (Figure 6b); however, different patterns were  
372 observed with different gene groups: *tetY* (Figure 6c) and *tet40* (Figure 6d) declined  
373 sharply within two weeks, while others, e.g. *tetM* (Figure 6e) were maintained in stored  
374 slurry. According to BLAST analysis against the NCBI database, mini-tank contigs  
375 containing *tetY* (2 contigs) were likely associated with Gamma-Proteobacteria, while  
376 *tet40* (6 contigs) was consistently linked to Firmicutes. Similarly, *tetM* was typically  
377 associated with Firmicutes (7 of 16 contigs; >89% sequence coverage, >99% sequence  
378 identity), more specifically Bacilli. The proportion of MLS ARGs remained comparatively  
379 stable throughout (Figure 6f), consistent with their presence not connected with patterns  
380 of MLS use on the farm.

381 We implemented a two-stage in series storage mathematical model to consider whether  
382 the storage of slurry in the main tank, without fresh inputs, would reduce AMR in slurry  
383 prior to land application. The model predicted that after only four days of storage, 50%

384 of the amoxicillin- and cefalexin-resistant *E. coli* are removed, and after 60 days of  
385 storage, only 0.29% of cefalexin-resistant and 0.00001% of amoxicillin resistant *E. coli*  
386 remained (Figure 7a). However, the model predicts that tetracycline resistant bacteria  
387 will increase over this time by 25% due to ongoing selective pressure and low fitness  
388 cost. Importantly, multidrug resistant *E. coli* become undetectable.

389

### 390 **Simulations of altered antibiotic use support criteria for responsible use**

391 Simulations of on-farm antibiotic use (~9.7 mg/Population Correction Unit (PCU) in  
392 2017) result in low levels of penicillin and cephalosporin resistance, consistent with the  
393 empirical data. We simulated further reductions in antibiotics entering the tank to either  
394 50% or 10% of current use. Neither reduction had a material impact on either resistance  
395 (Figure 7b) but there is a small reduction in tetracycline resistance (33% reduction in  
396 resistance at 10% usage) because of the reduced selective pressure for tetracycline  
397 resistance.

398 Very few cephalosporin resistant *E. coli* were detected in the farm samples (detailed  
399 above). Thus, we also simulated a return to use of the critically important 4<sup>th</sup> generation  
400 cephalosporin (cefquinome) in place of cefalexin (1<sup>st</sup> generation), assuming that  
401 cefquinome resistance also confers resistance to cefalexin. After accounting for the lower  
402 recommended dosage of cefquinome relative to cefalexin, we found cefquinome use  
403 increased resistance to both cefquinome and cefalexin of only 0.65% and 0.35%  
404 increase respectively (Figure 7c). To represent high antibiotic use following an outbreak  
405 of disease, we simulated 50 mg/PCU of cefquinome used in place of cefalexin. Such a  
406 scenario was predicted to select an increase of cefquinome resistance of only 3.55%.

407

## 408 **Discussion**

409

### 410 **The slurry tank is a critical measurement and control point for AMR**

411 The bacterial community and ARGs in the slurry tank appear to be maintained in a state  
412 of dynamic equilibrium, with a balance between input of fresh microorganisms from the

413 cattle, and decline, as observed in the mini slurry-tank experiments. This equilibrium is  
414 also evident in the observed stability of the virome of the same tank over the same  
415 sampling period (73). The slurry tank maintains an array of ARGs, many of which have  
416 been found in other animal wastes. These include MLS genes such as *mefA* (24, 29, 74)  
417 and the *cfxA* group of beta-lactamase genes (24, 74, 75). The association of *cfxA* with  
418 Gram-positive organisms suggests that AMR phenotyping should routinely include a  
419 Gram-positive sentinel; *Enterococcus* spp. may be suitable because of their use in water  
420 quality analysis (76) and the inclusion of *E. faecium* in the ESKAPE pathogens list (77).  
421 Tetracycline resistance genes such as *tetW* and *tetM* have also been frequently found in  
422 cattle and swine waste (29, 78, 79). Although present in low quantities relative to other  
423 ARGs, *tetM* has the potential for selection and possible mobilisation (e.g., *ISEcp1* or  
424 Tn916-like elements). Consequently, the tank appears to be a critical sampling location,  
425 representative of the AMR status of the farm as a whole, reflecting current and previous  
426 antibiotic use. The presence of resistance genes to antibiotics with no recorded use (e.g.  
427 quinolone resistance, MLS genes) are likely to reflect broader environmental, and  
428 possibly human, input into the farm microbiome.

429 At a superficial level, the slurry tank appears to meet many criteria presumed to define a  
430 'hotspot' for AMR, which cite a high abundance of bacterial populations and the routine  
431 presence of antimicrobial residue (80). However, the concept of an AMR 'hotspot', where  
432 bacterial and antimicrobial abundance are assumed to lead to increases in AMR  
433 prevalence, alongside the related concept of 'reservoir', assumed to represent the  
434 nascent AMR genes circulating in the environment poised to be mobilised through  
435 antimicrobial exposure, are open to critique (81). Our findings suggest that the tank,  
436 rather than generating resistance, can ameliorate resistance, depending on the waste  
437 management practice, and that slurry be stored for at least two months without fresh  
438 slurry inputs to the system/tank. Thus, the tank is neither a hotspot nor a reservoir, but,  
439 if managed appropriately, can be a critical control point for reducing the transmission of  
440 ARGs and ARB from livestock into the wider environment.

441



442  
443 **Agricultural AMR policy should combine responsible antibiotic use with**  
444 **effective waste management**

445 Policy and industry guidance to reduce AMR focus on reduced or responsible agricultural  
446 antimicrobial use (25, 82, 83), including the cessation of use of human critical  
447 antibiotics. Our findings provide evidence in support of responsible use. Simulations of  
448 reductions below the already low level of 9 mg/PCU did not predict reductions in  
449 penicillin and cephalosporin resistance below current levels. However, reduced  
450 tetracycline use led to reduced tetracycline resistance, associated with the environmental  
451 stability of this antibiotic, suggesting that prudent antibiotic use could also include  
452 antibiotic choice encouraging use for those with shorter half-lives where medically  
453 appropriate. While our findings suggested that use of 3<sup>rd</sup> and 4<sup>th</sup> generation  
454 cephalosporins did not lead to substantial increases associated resistances, once such  
455 resistances are established, relevant genes, e.g. CTX-M, can be selected for by 1<sup>st</sup>  
456 generation use. Although UK policy initiatives have greatly reduced the use of 3<sup>rd</sup>/4<sup>th</sup>  
457 generation cephalosporins on UK dairy farms, globally their use remains prevalent, e.g.  
458 Ceftiofur (3<sup>rd</sup> generation cephalosporin) is routinely used in the US to treat metritis (84,  
459 85) and mastitis (86). Eliminating the use of these antibiotics in agricultural production  
460 should still be an important goal of national and global policies to mitigate the  
461 environmental dissemination of AMR (87).

462 A policy focus on antibiotic use is limited because of the need to use antibiotics to treat  
463 sick livestock. We also showed that waste management practice provides an additional  
464 mechanism to control AMR, by reducing the prevalence of resistance genes and key  
465 microbial phyla in slurry prior to soil amendment. Specifically, secondary storage of  
466 slurry for a period of 60 days, without fresh inflow, would significantly reduce the levels  
467 of ARB within the tank, representing an opportunity for rational farm design and practice  
468 to minimize AMR outcomes. This result is also concordant with other practices for  
469 mitigating AMR on farms, including the use of anaerobic digestion (79, 88),  
470 vermicomposting and solid-liquid separation (43).

471 Two qPCR-based studies surveying Finnish swine and dairy farms reported that storage  
472 of animal manure slurry coincided with significant increases in select tetracycline,  
473 sulphonamide and aminoglycoside resistance genes when compared to fresh manure  
474 (28, 29). However, the farms involved in these studies used storage systems which  
475 received regular fresh inflow during the sampling period. Our metagenomic analyses of  
476 mini-tanks indicate that in the absence of fresh input a range of ARG classes decline  
477 (e.g. aminoglycoside and beta-lactam ARGs) or remain relatively stable (e.g. MLS  
478 ARGs). Moreover, culture-based results confirm an overall reduction in antibiotic  
479 resistant *E. coli* in slurry stored without inflow. Collectively, this provides empirical  
480 evidence supporting existing UK guidelines regarding the storage of slurry without  
481 further input as a means of reducing environmental exposure to AMR determinants.

482

#### 483 **Evaluation of co-selection needs alternative approaches**

484 Aminoglycoside, tetracycline and sulphonamide resistance genes were found on the  
485 same contigs. The result is consistent with sulphonamide resistance being co-selected by  
486 concurrent use of multiple antimicrobials because aminoglycosides and tetracycline were  
487 the two antibiotic classes used most during the sampling period. We anticipated finding  
488 evidence of co-occurrence of ARGs and MRGs in assembled metagenomic data, in  
489 accordance with other studies (19, 24, 89). However, apart from antibiotic resistance  
490 associated with Tn21-like elements carrying integrons, we found no evidence for such  
491 linkage in the slurry metagenomes or sequenced *E. coli* strains. This lack of evidence  
492 might not be evidence of absence of ARG-MRG co-occurrence, as these genes may not  
493 necessarily be genetically linked on a chromosome or on plasmids, and yet still be  
494 subject to co-selection if they reside in the same cell. Accordingly, the use of long-read  
495 or hybrid genome sequencing of strains selected for zinc or copper resistance may be  
496 more appropriate for detecting the co-occurrence of ARGs and MRGs (90).

497

#### 498 **Conclusions**

499

500 We have conducted a longitudinal, interdisciplinary study of the dynamics of AMR in a  
501 dairy slurry tank. The microbiota was in a state of dynamic equilibrium, with fresh input  
502 of bacteria from the animals balanced by natural decay. Antibiotic resistance was  
503 maintained, reflecting current and previous veterinary practice, as well as interaction  
504 with the broader environment. The slurry tank is therefore both a natural measurement  
505 point for on-farm resistance, as well as a control countermeasure point for resistance  
506 being released into the wider environment (land and water). The spread of antibiotic  
507 resistance into the wider environment through slurry application can be mitigated by a  
508 combination of responsible antibiotic use, including low total quantity, avoidance of  
509 human critical antibiotics, and antibiotic choice with shorter half-lives, with slurry  
510 storage. These approaches can mitigate spread of AMR into the environment from one of  
511 the world's largest sources of AMR pollution.

512

513

## 514 Author Contributions

515 Michelle Baker: Methodology, Formal Analysis, Investigation, Writing – Original Draft,  
516 Visualization

517 Alexander D Williams: Formal Analysis, Investigation, Data Curation, Writing – Original  
518 Draft, Visualization

519 Steven P.T. Hooton: Methodology, Investigation

520 Richard Helliwell: Investigation, Writing – Original Draft

521 Elizabeth King: Methodology, Investigation, Supervision

522 Thomas Dodsworth: Methodology, Investigation

523 Rosa María Baena-Nogueras: Methodology, Investigation

524 Andrew Warry: Methodology, Formal Analysis, Data Curation, Visualization

525 Catherine Ortori: Investigation

- 526 Henry Todman: Methodology, Investigation
- 527 Charlotte J. Gray-Hammerton: Investigation
- 528 Ryan Cook: Data Curation
- 529 Alexander C. W. Pritchard: Investigation
- 530 Ethan Iles: Investigation
- 531 Richard Emes: Conceptualization, Acquisition of Funding
- 532 Michael A Jones: Conceptualization, Acquisition of Funding
- 533 David A Barrett: Conceptualization, Supervision, Acquisition of Funding
- 534 Theodore Kypraios: Conceptualization, Supervision, Acquisition of Funding
- 535 Stephen J Ramsden: Conceptualization, Acquisition of Funding, Writing – Reviewing and  
536 Editing
- 537 Chris Hudson: Conceptualization, Acquisition of Funding, Writing – Reviewing and Editing
- 538 Andrew D Millard: Conceptualization, Acquisition of Funding, Writing – Reviewing and  
539 Editing
- 540 Sujatha Raman: Conceptualization, Acquisition of Funding, Supervision, Writing –  
541 Reviewing and Editing
- 542 Helen West: Conceptualization, Acquisition of Funding, Supervision
- 543 Carol Morris: Conceptualization, Acquisition of Funding, Supervision, Writing – Reviewing  
544 and Editing
- 545 Rachel L Gomes: Conceptualization, Acquisition of Funding, Supervision, Writing –  
546 Reviewing and Editing
- 547 Christine E R Dodd: Conceptualization, Acquisition of Funding, Supervision, Writing –  
548 Reviewing and Editing

549 Jan-Ulrich Kreft: Conceptualization, Acquisition of Funding, Supervision, Writing –  
550 Reviewing and Editing

551 Jon L Hobman: Conceptualization, Acquisition of Funding, Supervision, Writing –  
552 Reviewing and Editing

553 Dov J Stekel: Conceptualization, Formal Analysis, Supervision, Writing – Reviewing and  
554 Editing, Project Administration, Acquisition of Funding

555

## 556 Data Availability

557

558 Genome sequences are deposited with NCBI under BioProject PRJNA736866.

559 Metagenome sequences are deposited with the ENA under Study Accession PRJEB38990.

560 Mathematical models are deposited in BioModels as MODEL1909100001 and

561 MODEL1909120002. All other data, including all details of accession numbers of genome

562 and metagenome sequences, are on Figshare (<https://figshare.com>) under project

563 number 133176.

564

## 565 Acknowledgments

566

567 This work was supported by Antimicrobial Resistance Cross Council Initiative supported

568 by the seven United Kingdom research councils (NE/N019881/1). ADW was funded by a

569 NERC STARS PhD scholarship (NE/M009106/1). CJGH and ACWP were funded by the

570 BBSRC Nottingham-Rothamsted Doctoral Training Partnership (BB/M008770/1). RC is

571 supported by a scholarship from the Medical Research Foundation National PhD Training

572 Programme in Antimicrobial Resistance Research (MRF-145-0004-TPG-AVISO).

573 Bioinformatic analysis was made possible via the use of MRC-CLIMB ([MR/L015080/1](https://doi.org/10.1101/2022.02.22.481441).)

574 and CLIMB-BIG DATA ([MR/T030062/1](https://doi.org/10.1101/2022.02.22.481441)). We thank Chris Thomas, Emma Allaway and

575 David Allaway for support with grant development. We thank Nigel Armstrong and the

576 farm staff for their time, patience and support. We thank the external advisory board

577 members for support, critique and feedback of our research: Nigel Brown, Brian Dalby,

578 Gareth Hateley, Derek Armstrong, Katherine Grace, Marion Bos, Stacey Brown, Milen  
579 Georgiev, Javier Dominquez, Martin Rigley, Karen Heaton, Rupert Hough, Josh Onyango,  
580 Amreesh Mishra, Paul Wilson and Phil O'Neil. DJS thanks W Levine Stekel and CF Levine  
581 Stekel for useful conversation and advice. We thank Emma Hooley for her support  
582 throughout the entire research process.

583

584

585

586

587

588

589

## 590 [References](#)

- 591 1. Van Boeckel TP, Glennon EE, Chen D, Gilbert M, Robinson TP, Grenfell BT, et al.  
592 Reducing antimicrobial use in food animals. *Science*. 2017;357(6358):1350-2.
- 593 2. Vogt D, Overesch G, Endimiani A, Collaud A, Thomann A, Perreten V. Occurrence  
594 and genetic characteristics of third-generation cephalosporin-resistant *Escherichia coli* in  
595 Swiss retail meat. *Microbial drug resistance*. 2014;20(5):485-94.
- 596 3. Lammie SL, Hughes JM. Antimicrobial resistance, food safety, and one health: the  
597 need for convergence. *Annual review of food science and technology*. 2016;7:287-312.
- 598 4. Gundogan N, Avci E. Occurrence and antibiotic resistance of *Escherichia coli*, *S*  
599 *taphylococcus aureus* and *Bacillus cereus* in raw milk and dairy products in Turkey.  
600 *International journal of dairy technology*. 2014;67(4):562-9.
- 601 5. Silveira-Filho VM, Luz IS, Campos APF, Silva WM, Barros MPS, Medeiros ES, et al.  
602 Antibiotic resistance and molecular analysis of *Staphylococcus aureus* isolated from

- 603 cow's milk and dairy products in northeast Brazil. *Journal of food protection*.  
604 2014;77(4):583-91.
- 605 6. Marti R, Tien Y-C, Murray R, Scott A, Sabourin L, Topp E. Safely coupling livestock  
606 and crop production systems: how rapidly do antibiotic resistance genes dissipate in soil  
607 following a commercial application of swine or dairy manure? *Applied and environmental*  
608 *microbiology*. 2014;80(10):3258-65.
- 609 7. Guron GK, Arango-Argoty G, Zhang L, Pruden A, Ponder MA. Effects of Dairy  
610 Manure-Based Amendments and Soil Texture on Lettuce-and Radish-Associated  
611 Microbiota and Resistomes. *Mosphere*. 2019;4(3).
- 612 8. Joy SR, Bartelt-Hunt SL, Snow DD, Gilley JE, Woodbury BL, Parker DB, et al. Fate  
613 and transport of antimicrobials and antimicrobial resistance genes in soil and runoff  
614 following land application of swine manure slurry. *Environmental science & technology*.  
615 2013;47(21):12081-8.
- 616 9. Neher TP, Ma L, Moorman TB, Howe A, Soupier ML. Seasonal variations in export  
617 of antibiotic resistance genes and bacteria in runoff from an agricultural watershed in  
618 Iowa. *Science of The Total Environment*. 2020;738:140224.
- 619 10. FAO. Livestock and environment statistics: manure and greenhouse gas  
620 emissions. Global, regional and country trends 1990–2018. 2020.
- 621 11. Willett W, Rockström J, Loken B, Springmann M, Lang T, Vermeulen S, et al. Food  
622 in the Anthropocene: the EAT–Lancet Commission on healthy diets from sustainable food  
623 systems. *The Lancet*. 2019;393(10170):447-92.
- 624 12. Smith K, Williams A. Production and management of cattle manure in the UK and  
625 implications for land application practice. *Soil Use and Management*. 2016;32:73-82.
- 626 13. DEFRA. The national inventory and map of livestock manure loadings to  
627 agricultural land (Manures-GIS) - WQ0103. 2016.
- 628 14. Oliver SP, Murinda SE, Jayarao BM. Impact of antibiotic use in adult dairy cows on  
629 antimicrobial resistance of veterinary and human pathogens: a comprehensive review.  
630 *Foodborne pathogens and disease*. 2011;8(3):337-55.
- 631 15. DDC. Dairy Youngstock Project- Wales, Full Report. 2015.

- 632 16. CHAWG. GB Cattle Health & Welfare Group, 4th Report. 2018.
- 633 17. CHAWG. GB Cattle Health & Welfare Group, 5th Report. 2020.
- 634 18. Griffiths BE, Dai White G, Oikonomou G. A cross-sectional study into the  
635 prevalence of dairy cattle lameness and associated herd-level risk factors in England and  
636 Wales. *Frontiers in veterinary science*. 2018;5:65.
- 637 19. Pal C, Bengtsson-Palme J, Kristiansson E, Larsson DJ. Co-occurrence of resistance  
638 genes to antibiotics, biocides and metals reveals novel insights into their co-selection  
639 potential. *BMC genomics*. 2015;16(1):964.
- 640 20. Davies R, Wales A. Antimicrobial resistance on farms: a review including  
641 biosecurity and the potential role of disinfectants in resistance selection. *Comprehensive  
642 reviews in food science and food safety*. 2019;18(3):753-74.
- 643 21. Seiffert SN, Hilty M, Perreten V, Endimiani A. Extended-spectrum cephalosporin-  
644 resistant Gram-negative organisms in livestock: an emerging problem for human health?  
645 *Drug Resistance Updates*. 2013;16(1-2):22-45.
- 646 22. Ibrahim DR, Dodd CE, Stekel DJ, Ramsden SJ, Hobman JL. Multidrug resistant,  
647 extended spectrum  $\beta$ -lactamase (ESBL)-producing *Escherichia coli* isolated from a dairy  
648 farm. *FEMS microbiology ecology*. 2016;92(4).
- 649 23. Wichmann F, Udikovic-Kolic N, Andrew S, Handelsman J. Diverse antibiotic  
650 resistance genes in dairy cow manure. *MBio*. 2014;5(2):e01017-13.
- 651 24. Zhou B, Wang C, Zhao Q, Wang Y, Huo M, Wang J, et al. Prevalence and  
652 dissemination of antibiotic resistance genes and coselection of heavy metals in Chinese  
653 dairy farms. *Journal of hazardous materials*. 2016;320:10-7.
- 654 25. FAO/OiE/WHO. Monitoring Global Progress on Addressing Antimicrobial  
655 Resistance, Analysis report of the second round of results of AMR country self-  
656 assessment survey. 2018.
- 657 26. UK-VARSS. Veterinary Antibiotic Resistance and Sales Surveillance  
658 Report (UK-VARSS 2019). 2020.



- 659 27. GOV.UK. Handling of manure and slurry to reduce antibiotic resistance 2016  
660 [Available from: [https://www.gov.uk/guidance/handling-of-manure-and-slurry-to-](https://www.gov.uk/guidance/handling-of-manure-and-slurry-to-reduce-antibiotic-resistance)  
661 [reduce-antibiotic-resistance](https://www.gov.uk/guidance/handling-of-manure-and-slurry-to-reduce-antibiotic-resistance).
- 662 28. Ruuskanen M, Muurinen J, Meierjohan A, Pärnänen K, Tamminen M, Lyra C, et al.  
663 Fertilizing with animal manure disseminates antibiotic resistance genes to the farm  
664 environment. *Journal of environmental quality*. 2016;45(2):488-93.
- 665 29. Muurinen J, Stedtfeld R, Karkman A, Parnanen K, Tiedje J, Virta M. Influence of  
666 manure application on the environmental resistome under Finnish agricultural practice  
667 with restricted antibiotic use. *Environmental science & technology*. 2017;51(11):5989-  
668 99.
- 669 30. Hurst JJ, Oliver JP, Schueler J, Gooch C, Lansing S, Crossette E, et al. Trends in  
670 antimicrobial resistance genes in manure blend pits and long-term storage across dairy  
671 farms with comparisons to antimicrobial usage and residual concentrations.  
672 *Environmental science & technology*. 2019;53(5):2405-15.
- 673 31. Durso LM, Harhay GP, Bono JL, Smith TP. Virulence-associated and antibiotic  
674 resistance genes of microbial populations in cattle feces analyzed using a metagenomic  
675 approach. *Journal of microbiological methods*. 2011;84(2):278-82.
- 676 32. Noyes NR, Yang X, Linke LM, Magnuson RJ, Cook SR, Zaheer R, et al.  
677 Characterization of the resistome in manure, soil and wastewater from dairy and beef  
678 production systems. *Scientific reports*. 2016;6(1):1-12.
- 679 33. Rovira P, McAllister T, Lakin SM, Cook SR, Doster E, Noyes NR, et al.  
680 Characterization of the microbial resistome in conventional and "raised without  
681 antibiotics" beef and dairy production systems. *Frontiers in microbiology*. 2019;10:1980.
- 682 34. Gaeta NC, Bean E, Miles AM, de Carvalho DUOG, Alemán MAR, Carvalho JS, et al.  
683 A cross-sectional study of dairy cattle metagenomes reveals increased antimicrobial  
684 resistance in animals farmed in a heavy metal contaminated environment. *Frontiers in*  
685 *microbiology*. 2020;11.

- 686 35. Himathongkham S, Bahari S, Riemann H, Cliver D. Survival of Escherichia coli  
687 O157: H7 and Salmonella typhimurium in cow manure and cow manure slurry. FEMS  
688 Microbiology Letters. 1999;178(2):251-7.
- 689 36. Placha I, Venglovský J, Sasakova N, Svoboda I. The effect of summer and winter  
690 seasons on the survival of Salmonella typhimurium and indicator micro-organisms during  
691 the storage of solid fraction of pig slurry. Journal of Applied Microbiology.  
692 2001;91(6):1036-43.
- 693 37. Nicholson FA, Groves SJ, Chambers BJ. Pathogen survival during livestock  
694 manure storage and following land application. Bioresource technology. 2005;96(2):135-  
695 43.
- 696 38. Sharma M, Reynnells R. Importance of Soil Amendments: Survival of Bacterial  
697 Pathogens in Manure and Compost Used as Organic Fertilizers. Microbiology Spectrum.  
698 2016;4(4).
- 699 39. Schubert H, Morley K, Puddy EF, Arbon R, Findlay J, Mounsey O, et al. Reduced  
700 Antibacterial Drug Resistance and blaCTX-M  $\beta$ -Lactamase Gene Carriage in Cattle-  
701 Associated Escherichia coli at Low Temperatures, at Sites Dominated by Older Animals,  
702 and on Pastureland: Implications for Surveillance. Applied and Environmental  
703 Microbiology. 2021;87(6).
- 704 40. Halbert LW, Kaneene JB, Ruegg PL, Warnick LD, Wells SJ, Mansfield LS, et al.  
705 Evaluation of antimicrobial susceptibility patterns in Campylobacter spp isolated from  
706 dairy cattle and farms managed organically and conventionally in the midwestern and  
707 northeastern United States. Journal of the American Veterinary Medical Association.  
708 2006;228(7):1074-81.
- 709 41. Feng X, Littier HM, Knowlton KF, Garner E, Pruden A. The impacts of feeding milk  
710 with antibiotics on the fecal microbiome and antibiotic resistance genes in dairy calves.  
711 Canadian Journal of Animal Science. 2019;100(1):69-76.
- 712 42. Feng X, Chambers LR, Knowlton KF. Antibiotic resistance genes in the faeces of  
713 dairy cows following short-term therapeutic and prophylactic antibiotic administration.  
714 Journal of Applied Animal Research. 2020;48(1):34-7.

- 715 43. Oliver JP, Hurst JJ, Gooch CA, Stappenbeck A, Sassoubre L, Aga DS. On-farm  
716 screw-press/rotary drum treatment of dairy manure associated antibiotic residues and  
717 resistance. Wiley Online Library; 2020. Report No.: 0047-2425.
- 718 44. CLSI. Performance Standards for Antimicrobial Susceptibility Testing- M100S.  
719 2016.
- 720 45. Yang H, Wei S-H, Hobman JL, Dodd CE. Antibiotic and metal resistance in  
721 *Escherichia coli* isolated from pig slaughterhouses in the United Kingdom. *Antibiotics*.  
722 2020;9(11):746.
- 723 46. Hooton SP, Pritchard AC, Asiani K, Gray-Hammerton CJ, Stekel DJ, Crossman LC,  
724 et al. Laboratory stock variants of the archetype silver resistance plasmid pMG101  
725 demonstrate plasmid fusion, loss of transmissibility, and transposition of Tn7/pco/sil Into  
726 the host chromosome. *Frontiers in Microbiology*. 2021;12.
- 727 47. Seemann T. Prokka: rapid prokaryotic genome annotation. *Bioinformatics*.  
728 2014;30(14):2068-9.
- 729 48. Chen K-T, Lu CL. CSAR-web: a web server of contig scaffolding using algebraic  
730 rearrangements. *Nucleic acids research*. 2018;46(W1):W55-W9.
- 731 49. Bortolaia V, Kaas RS, Ruppe E, Roberts MC, Schwarz S, Cattoir V, et al. ResFinder  
732 4.0 for predictions of phenotypes from genotypes. *Journal of Antimicrobial*  
733 *Chemotherapy*. 2020;75(12):3491-500.
- 734 50. Carattoli A, Zankari E, Garcia-Fernandez A, Larsen MV, Lund O, Villa L, et al.  
735 PlasmidFinder and pMLST: in silico detection and typing of plasmids. *Antimicrobial*  
736 *agents and chemotherapy*. 2014.
- 737 51. Baena-Nogueras R, Ortori C, Barrett D, Gomes R, editors. Analysis of veterinary  
738 antibiotics in dairy environments by liquid chromatography–mass spectrometry. 15th  
739 International Conference on Environmental Science and Technology Rhodes, Greece;  
740 2017.
- 741 52. Martin M. Cutadapt removes adapter sequences from high-throughput sequencing  
742 reads. *EMBnet journal*. 2011;17(1):10-2.

- 743 53. Joshi N, Fass J. Sickle: A sliding-window, adaptive, quality-based trimming tool  
744 for FastQ files (Version 1.33)[Software]. 2011.
- 745 54. Chen S, Zhou Y, Chen Y, Gu J. fastp: an ultra-fast all-in-one FASTQ preprocessor.  
746 *Bioinformatics*. 2018;34(17):i884-i90.
- 747 55. Li D, Liu C-M, Luo R, Sadakane K, Lam T-W. MEGAHIT: an ultra-fast single-node  
748 solution for large and complex metagenomics assembly via succinct de Bruijn graph.  
749 *Bioinformatics*. 2015;31(10):1674-6.
- 750 56. Arango-Argoty G, Garner E, Pruden A, Heath LS, Vikesland P, Zhang L. DeepARG:  
751 a deep learning approach for predicting antibiotic resistance genes from metagenomic  
752 data. *Microbiome*. 2018;6(1):1-15.
- 753 57. Seemann T. Abricate. Github2020.
- 754 58. Doster E, Lakin SM, Dean CJ, Wolfe C, Young JG, Boucher C, et al. MEGARes 2.0:  
755 a database for classification of antimicrobial drug, biocide and metal resistance  
756 determinants in metagenomic sequence data. *Nucleic acids research*.  
757 2020;48(D1):D561-D9.
- 758 59. Leplae R, Lima-Mendez G, Toussaint A. ACLAME: a CLAssification of Mobile  
759 genetic Elements, update 2010. *Nucleic acids research*. 2010;38(suppl\_1):D57-D61.
- 760 60. Wang LYR, Jokinen CC, Laing CR, Johnson RP, Ziebell K, Gannon VP. Multi-year  
761 persistence of verotoxigenic *Escherichia coli* (VTEC) in a closed Canadian beef herd: a  
762 cohort study. *Frontiers in microbiology*. 2018;9:2040.
- 763 61. Pal C, Bengtsson-Palme J, Rensing C, Kristiansson E, Larsson DJ. BacMet:  
764 antibacterial biocide and metal resistance genes database. *Nucleic acids research*.  
765 2014;42(D1):D737-D43.
- 766 62. Hyatt D, Chen G-L, LoCascio PF, Land ML, Larimer FW, Hauser LJ. Prodigal:  
767 prokaryotic gene recognition and translation initiation site identification. *BMC*  
768 *bioinformatics*. 2010;11(1):1-11.
- 769 63. Menzel P, Ng KL, Krogh A. Fast and sensitive taxonomic classification for  
770 metagenomics with Kaiju. *Nature communications*. 2016;7(1):1-9.

- 771 64. NCBI. National Center for Biotechnology Information: Bethesda (MD): National  
772 Library of Medicine (US), National Center for Biotechnology Information; [1988]  
773 [Available from: <https://www.ncbi.nlm.nih.gov/>].
- 774 65. Altschul SF, Gish W, Miller W, Myers EW, Lipman DJ. Basic local alignment search  
775 tool. *Journal of molecular biology*. 1990;215(3):403-10.
- 776 66. Morgulis A, Coulouris G, Raytselis Y, Madden TL, Agarwala R, Schäffer AA.  
777 Database indexing for production MegaBLAST searches. *Bioinformatics*.  
778 2008;24(16):1757-64.
- 779 67. Shaw LM, Blanchard A, Chen Q, An X, Davies P, Töttemeyer S, et al. DirtyGenes:  
780 testing for significant changes in gene or bacterial population compositions from a small  
781 number of samples. *Scientific reports*. 2019;9(1):1-10.
- 782 68. Baker M, Hobman JL, Dodd CE, Ramsden SJ, Stekel DJ. Mathematical modelling  
783 of antimicrobial resistance in agricultural waste highlights importance of gene transfer  
784 rate. *FEMS Microbiology Ecology*. 2016;92(4).
- 785 69. Arya S, Williams A, Reina SV, Knapp CW, Kreft J-U, Hobman JL, et al. Towards a  
786 general model for predicting minimal metal concentrations co-selecting for antibiotic  
787 resistance plasmids. *Environmental Pollution*. 2021;275:116602.
- 788 70. Malik-Sheriff RS, Glont M, Nguyen TV, Tiwari K, Roberts MG, Xavier A, et al.  
789 BioModels—15 years of sharing computational models in life science. *Nucleic acids*  
790 *research*. 2020;48(D1):D407-D15.
- 791 71. Magiorakos A-P, Srinivasan A, Carey R, Carmeli Y, Falagas M, Giske C, et al.  
792 Multidrug-resistant, extensively drug-resistant and pandrug-resistant bacteria: an  
793 international expert proposal for interim standard definitions for acquired resistance.  
794 *Clinical microbiology and infection*. 2012;18(3):268-81.
- 795 72. Byrne-Bailey K, Gaze W, Kay P, Boxall A, Hawkey P, Wellington E. Prevalence of  
796 sulfonamide resistance genes in bacterial isolates from manured agricultural soils and pig  
797 slurry in the United Kingdom. *Antimicrobial Agents and Chemotherapy*. 2009;53(2):696-  
798 702.

- 799 73. Cook R, Hooton S, Trivedi U, King L, Dodd CE, Hobman JL, et al. Hybrid assembly  
800 of an agricultural slurry virome reveals a diverse and stable community with the  
801 potential to alter the metabolism and virulence of veterinary pathogens. *Microbiome*.  
802 2021;9(1):1-17.
- 803 74. Li B, Yang Y, Ma L, Ju F, Guo F, Tiedje JM, et al. Metagenomic and network  
804 analysis reveal wide distribution and co-occurrence of environmental antibiotic resistance  
805 genes. *The ISME journal*. 2015;9(11):2490-502.
- 806 75. Zhang Y-J, Hu H-W, Gou M, Wang J-T, Chen D, He J-Z. Temporal succession of  
807 soil antibiotic resistance genes following application of swine, cattle and poultry manures  
808 spiked with or without antibiotics. *Environmental Pollution*. 2017;231:1621-32.
- 809 76. Bartram J, Pedley S. *Microbiological Analyses*. In: Bartram J, Ballance R, editors.  
810 *Water quality monitoring: a practical guide to the design and implementation of*  
811 *freshwater quality studies and monitoring programmes*: CRC Press; 1996.
- 812 77. Rice LB. *Federal funding for the study of antimicrobial resistance in nosocomial*  
813 *pathogens: no ESKAPE*. The University of Chicago Press; 2008.
- 814 78. Kyselková M, Jirout J, Vrchotová N, Schmitt H, Elhottová D. Spread of tetracycline  
815 resistance genes at a conventional dairy farm. *Frontiers in microbiology*. 2015;6:536.
- 816 79. Zhang J, Wang Z, Wang Y, Zhong H, Sui Q, Zhang C, et al. Effects of graphene  
817 oxide on the performance, microbial community dynamics and antibiotic resistance  
818 genes reduction during anaerobic digestion of swine manure. *Bioresource technology*.  
819 2017;245:850-9.
- 820 80. Lima T, Domingues S, Da Silva GJ. Manure as a Potential Hotspot for Antibiotic  
821 Resistance Dissemination by Horizontal Gene Transfer Events. *Veterinary Sciences*.  
822 2020;7(3):110.
- 823 81. Helliwell R, Raman S, Morris C. Environmental imaginaries and the environmental  
824 sciences of antimicrobial resistance. *Environment and Planning E: Nature and Space*.  
825 2020:2514848620950752.
- 826 82. O'Neill J. *Antimicrobial Resistance: Tackling a crisis for the health and wealth of*  
827 *nations*. 2014.

- 828 83. WHO. Global Action Plan on Antimicrobial Resistance. 2015.
- 829 84. Espadamala A, Pereira R, Pallares P, Lago A, Silva-Del-Rio N. Metritis diagnosis  
830 and treatment practices in 45 dairy farms in California. *Journal of dairy science*.  
831 2018;101(10):9608-16.
- 832 85. Silva T, de Oliveira E, Pérez-Báez J, Risco C, Chebel R, Cunha F, et al. Economic  
833 comparison between ceftiofur-treated and nontreated dairy cows with metritis. *Journal of*  
834 *Dairy Science*. 2021.
- 835 86. USDA A, VS, CEAH, NAHMS. Dairy 2014 Milk Quality, Milking Procedures, and  
836 Mastitis on U.S. Dairies, 2014. 2014.
- 837 87. Hughes A, Roe E, Hocknell S. Food supply chains and the antimicrobial resistance  
838 challenge: On the framing, accomplishments and limitations of corporate responsibility.  
839 *Environment and Planning A: Economy and Space*. 2021:0308518X211015255.
- 840 88. Sui Q, Zhang J, Chen M, Tong J, Wang R, Wei Y. Distribution of antibiotic  
841 resistance genes (ARGs) in anaerobic digestion and land application of swine  
842 wastewater. *Environmental Pollution*. 2016;213:751-9.
- 843 89. Li X, Rensing C, Vestergaard G, Nesme J, Gupta S, Arumugam M, et al.  
844 Metagenomic evidence for co-occurrence of antibiotic, biocide and metal resistance  
845 genes in pigs. *bioRxiv*. 2021.
- 846 90. Brown CL, Keenum IM, Dai D, Zhang L, Vikesland PJ, Pruden A. Critical evaluation  
847 of short, long, and hybrid assembly for contextual analysis of antibiotic resistance genes  
848 in complex environmental metagenomes. *Scientific reports*. 2021;11(1):1-12.

#### 849 Figure Legends

850 Figure 1: **Antimicrobial resistance phenotypes and reads in the slurry tank** (a)  
851 Resistances to a panel of 16 antibiotics (Supplementary Table 2) largely do not depend  
852 on the type of supplemented media used. (b) The number of resistances per isolates;  
853 37% of cultured isolates resistant to three or more antibiotic classes. These resistances  
854 are seen on all types of media. (c) Proportion of ARGs mapped to different antibiotic  
855 resistance classes (% reads). The metagenomic resistance profile is largely stable over

856 time. There appears to be a gradual increase in the proportion of aminoglycoside and  
857 beta lactam resistance genes, which could be seen as consistent with antibiotic use  
858 during that period, but there is no statistical significance to the changes in proportions.  
859 ARGs are also reasonably consistent with observed phenotype data.

860 **Figure 2: Stability of microbial ecosystem, *E. coli* counts and water quality**

861 **measures.** (a) water quality analysis from samples taken from the slurry tank over a  
862 five month period concurrent with microbial counts. Water quality measures are  
863 generally stable, with some fluctuations concordant with slurry use. (b) Six taxonomic  
864 groups accounting for at least 1% each of microbial reads show stable abundance in  
865 time. There is considerable diversity; these groups only account for 38% of reads, with  
866 all reads mapped to 178 different microbial phyla. (c) Counts of *E. coli* concentrations  
867 showing *E. coli* on TBX and MaConkey plates (all *E. coli*), TBX and AMP plates (*E. coli*  
868 resistant to ampicillin) and on CTX plates (ESC-R *E. coli*). Overall *E. coli* abundance is  
869 stable throughout the sampling period, as are counts of ampicillin resistant strains. CTX-  
870 resistant *E. coli* are only observed on five sampling days, and on all of those occasions  
871 at levels too low to be reliably quantified. The data for the other days are below the limit  
872 of detection of the method used and are plotted at 0 for ease of display.

873

874 **Figure 3: Antibiotic susceptibility testing of *E. coli* isolates shows diverse but**

875 **stable range of phenotypic resistances.** In each panel, the heatmap shows the  
876 proportion of strains resistant to each of 16 different antibiotics on each of the sampling  
877 dates. Grey bars indicate no use of those plate types on those dates. (a) plates without  
878 antibiotic supplement; (b) plates supplemented with ampicillin; (c) plates supplemented  
879 with cephalosporins. In all cases, the patterns of resistances are stable in time.

880 Cephalosporin supplemented plates identify more resistant strains than other plates,  
881 including to other antibiotic classes, including tetracyclines and quinolones.

882

883 **Figure 4: Model simulations of antimicrobials and antimicrobial resistance in the**

884 **slurry tank.** (a) Model prediction of resistant *E. coli* populations in the slurry tank over a



885 year's period, given (b) antibiotic usage on farm in 2017. Resistance groups are not  
886 mutually exclusive. The resistances are reasonably stable once the model simulation  
887 reaches its steady state, with fluctuations resulting from periodic removal of slurry for  
888 use as fertilizer. (b) Mass (in mg) of oxytetracycline, cefalexin and amoxicillin given  
889 during 2017 together with model simulation predicting concentrations (in mg L<sup>-1</sup>) of  
890 these antibiotics in the slurry tank over the same period. Observe that tetracycline is  
891 present in the tank, despite intermittent use, due to its high environmental stability. This  
892 explains the consistent proportion of tetracycline resistance. The two beta lactam  
893 antibiotics decay more rapidly after use.

894

895 Figure 5: **Storage without further waste-addition leads to a decline in select**  
896 **bacteria.** Relative abundances of *Escherichia* spp., *Pseudomonas* spp., *Klebsiella* spp.,  
897 *Bacteroides* spp., *Prevotella* spp. and *Alistipes* spp. in stored slurry based on  
898 metagenomic short-read data. *Escherichia* reads from metagenomics are concordant  
899 with culturing data (viable *E. coli* counts in CFU/ml over time are given in Figure S6a),  
900 both showing a stepwise decline. *Pseudomonas* and *Klebsiella* also show a stepwise  
901 decline. *Bacteroides*, *Prevotella*, and *Alistipes* show a gradual decline. *Acinetobacter*  
902 increase over the first four weeks before declining.

903

904 Figure 6: **Impact of mini tank storage on selected ARGs based on DeepARG**  
905 **analysis.** Relative abundance (percentage of reads) of (a) beta lactam ARGs; (b)  
906 tetracycline ARGs; (c) *tetY*; (d) *tet40*; (e) *tetM*; (f) MLS ARGs. The decline in beta  
907 lactam reads is consistent with other data. Tetracycline ARGs show different patterns for  
908 different genes. The persistence of MLS ARGs is consistent with their presence not  
909 related to lack of MLS use on the farm.

910

911 **Figure 7: Model simulations of altered farm practise or antibiotic use** (a) Storing  
912 slurry without fresh inflow for 60 days is predicted to reduce resistance. Cephalexin  
913 resistance is reduced by more than 99.99% while amoxicillin resistance is reduced by  
914 more than 99%. (b) Model predictions of current antibiotic usage (9.7 mg/PCU)  
915 compared to a 50% reduction (4.85mg/PCU) and 90% reduction (0.97mg/PCU) show  
916 negligible impact on slurry tank resistance levels. (c) Model predictions of the change in  
917 resistant *E. coli* in the tank when using a 4<sup>th</sup> generation cephalosporin instead of a 1<sup>st</sup>  
918 generation cephalosporin on low, medium and high antibiotic usage farms showing  
919 increased resistance to all relevant antibiotics.  
920  
921

# Figure 1

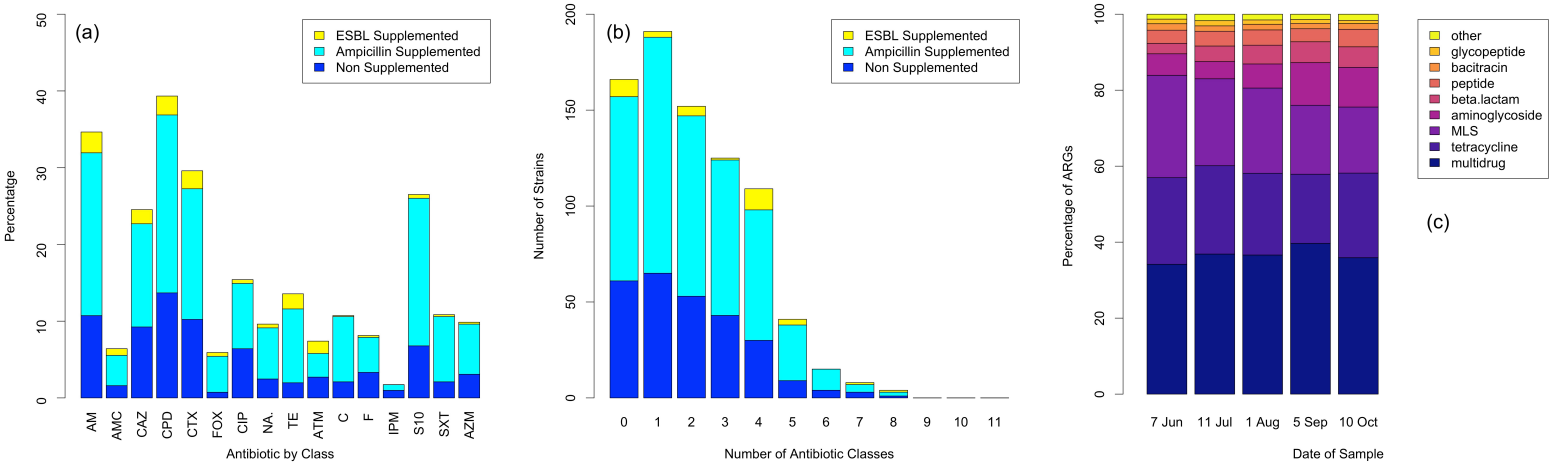

## Figure 2

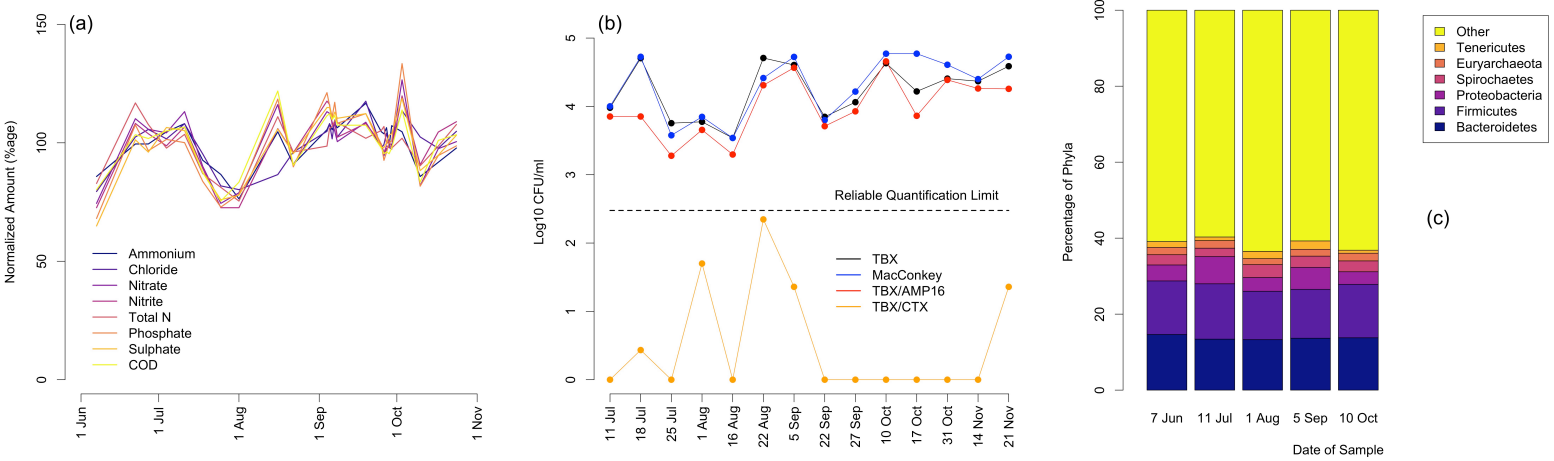

## Figure 3

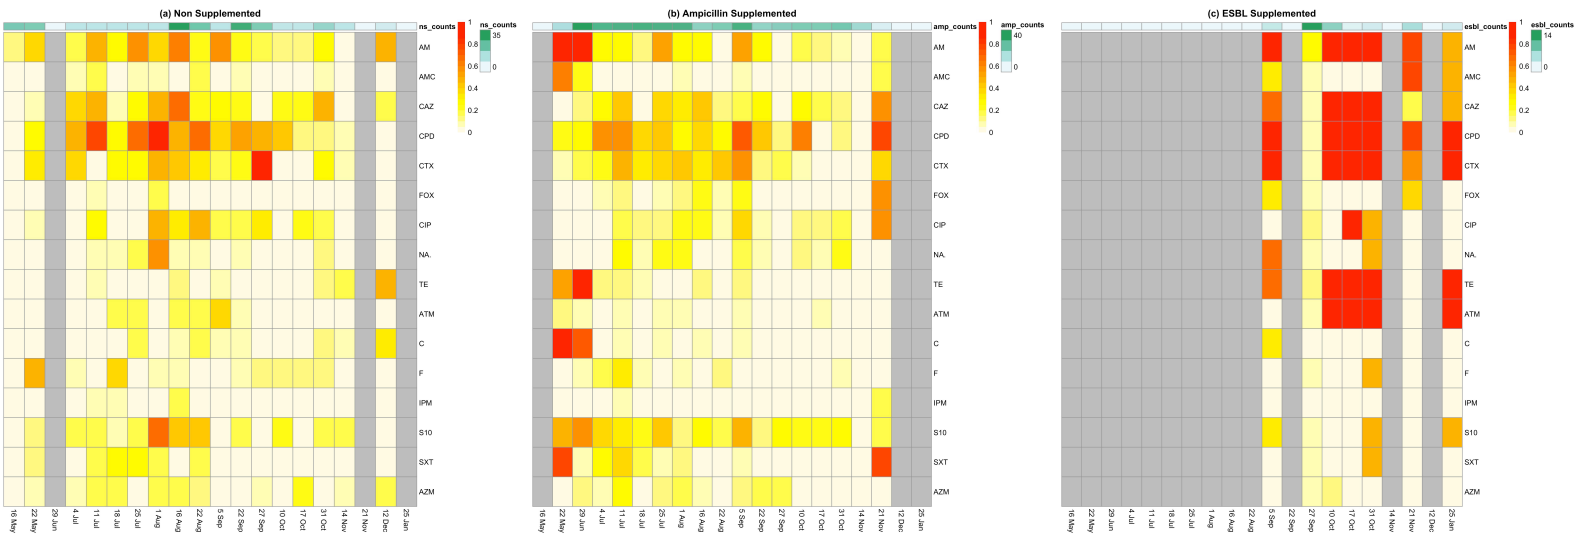

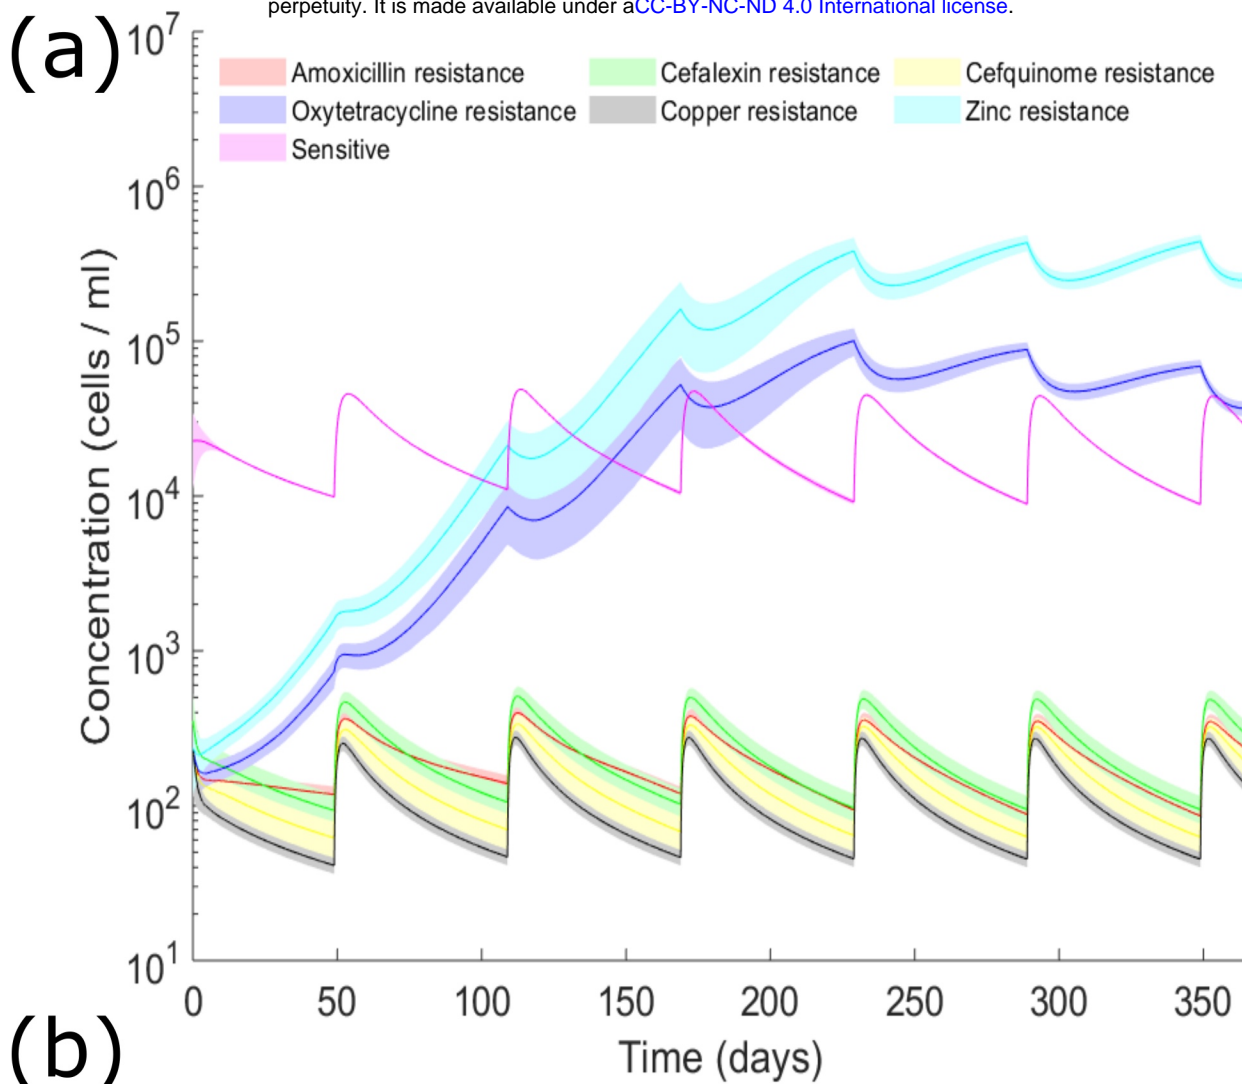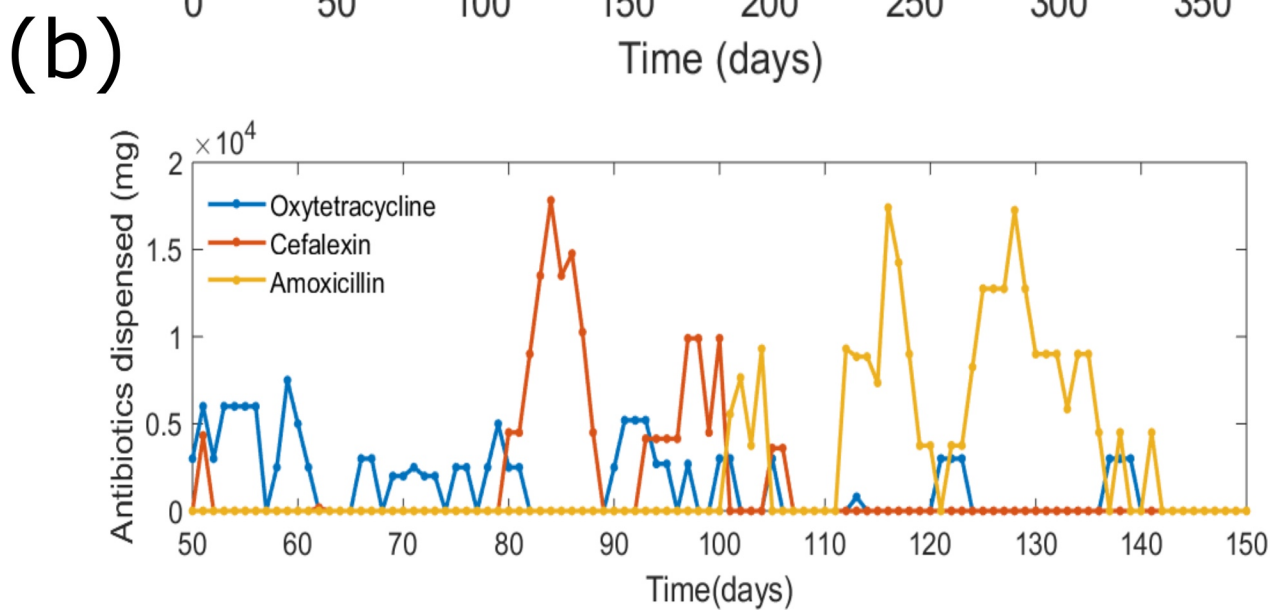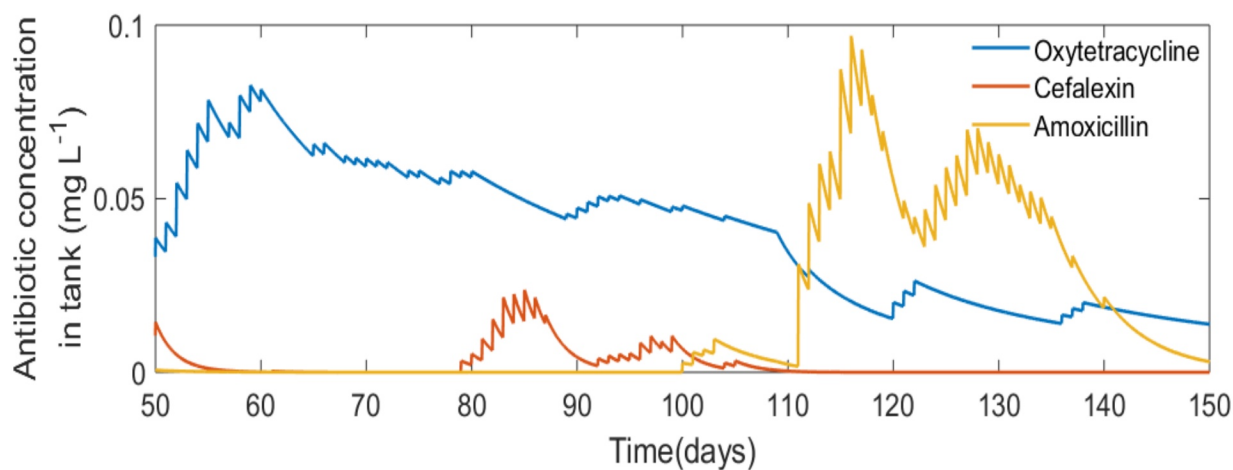

Figure 5

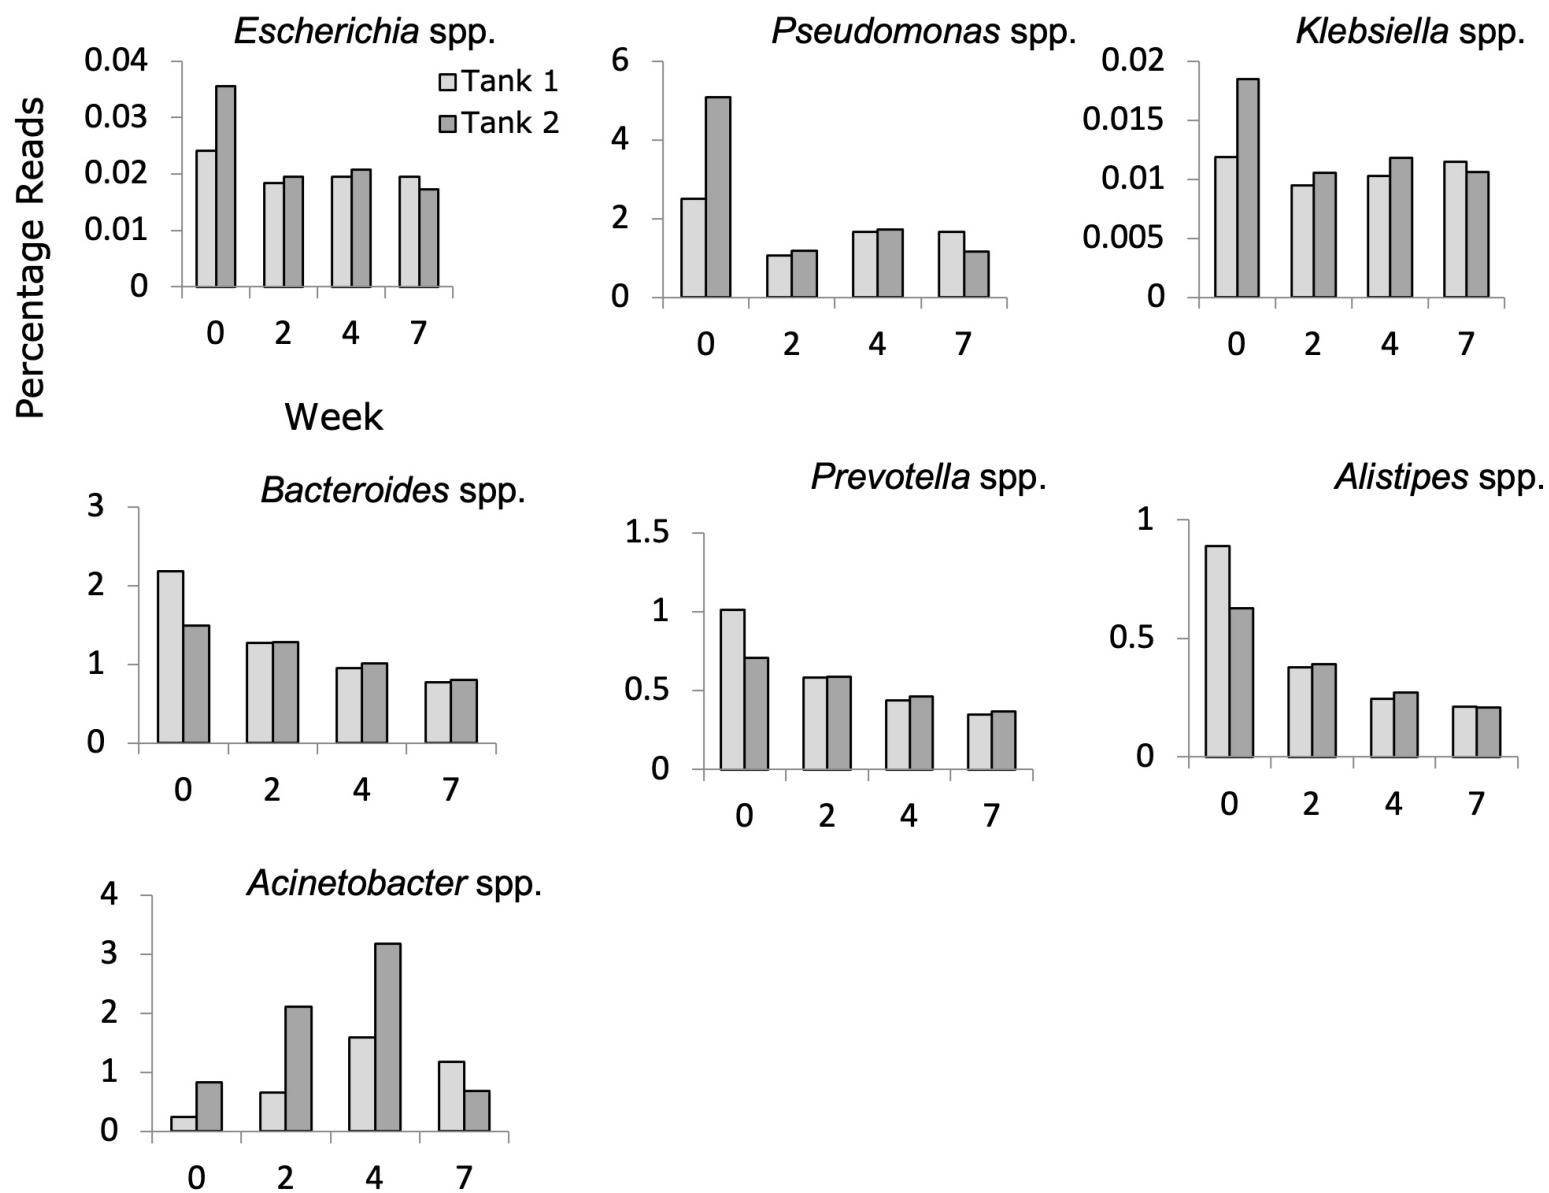

## Figure 6

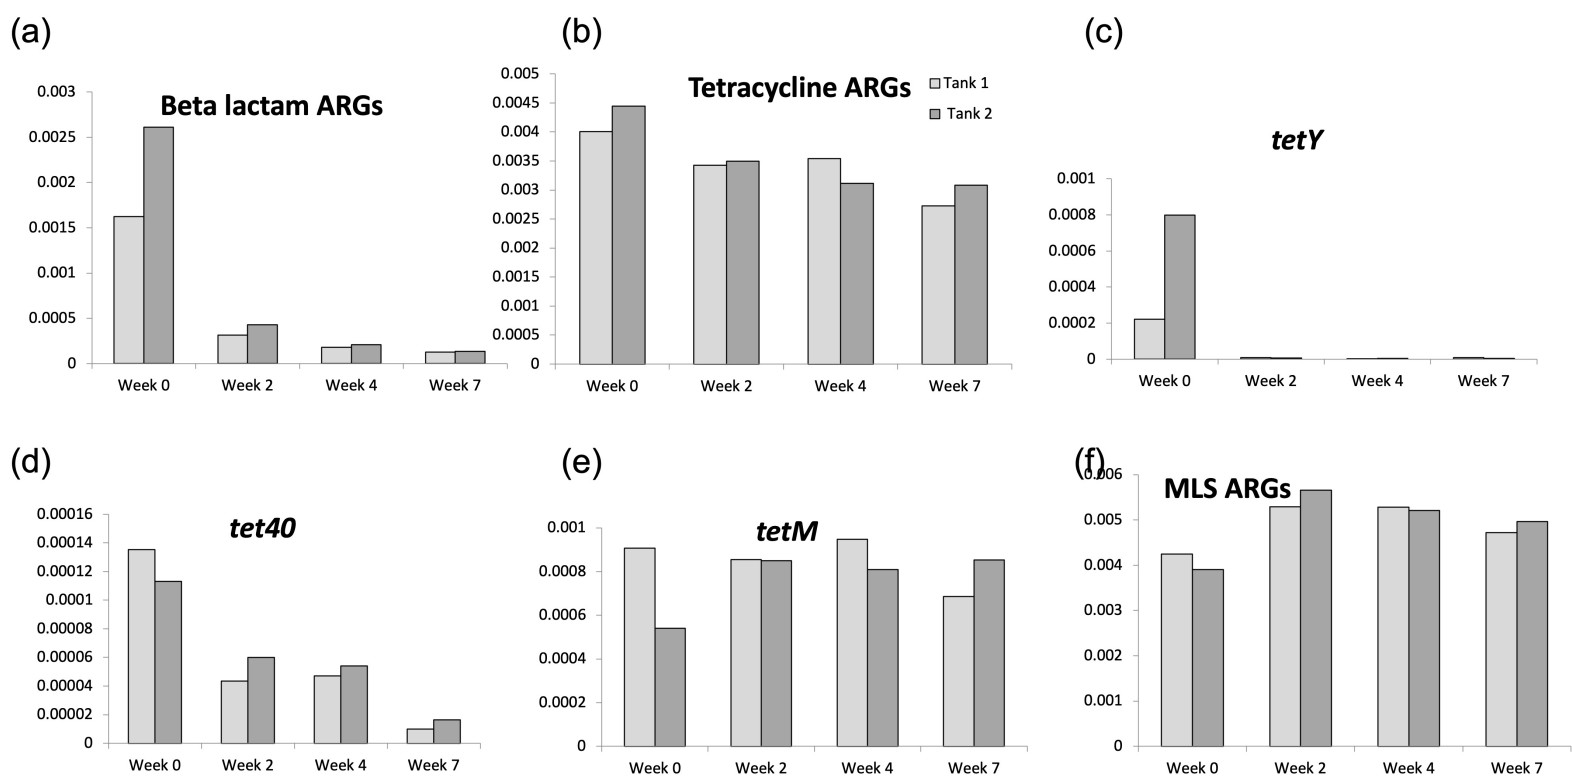



Figure 7

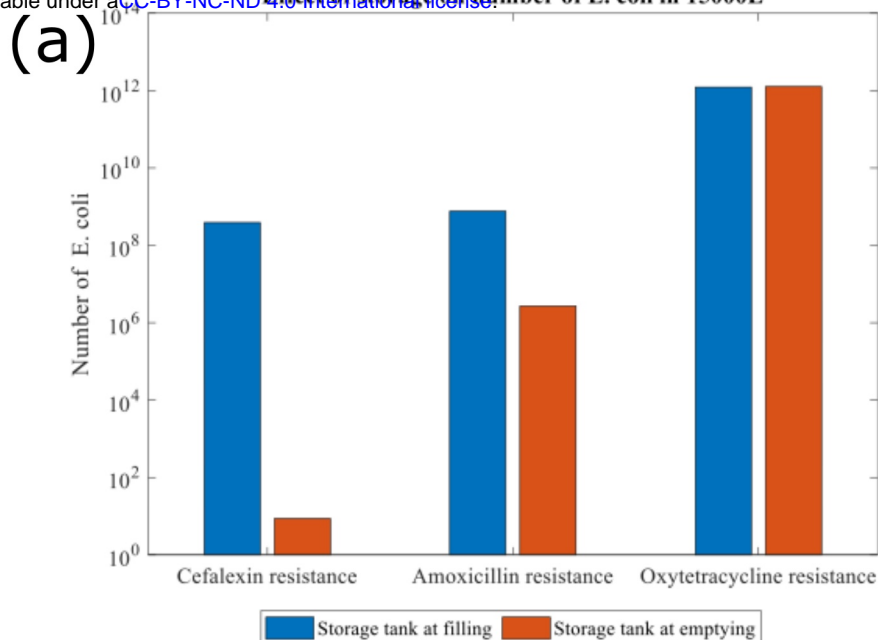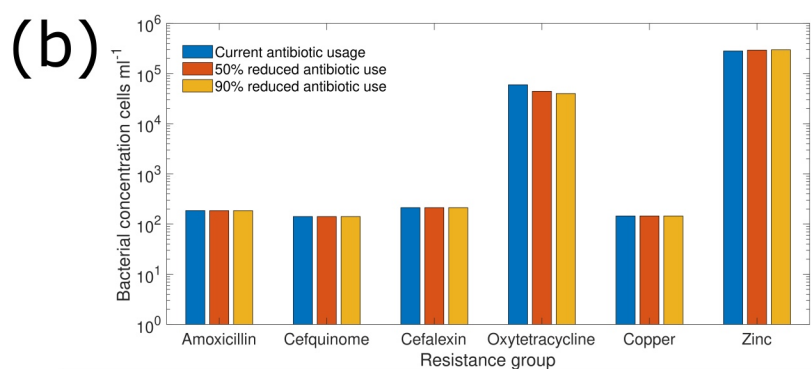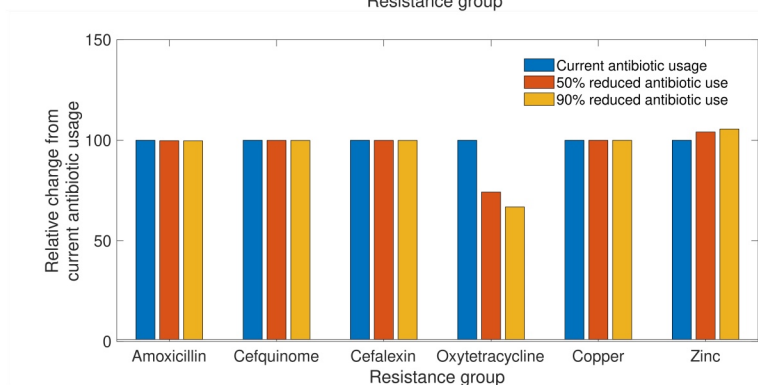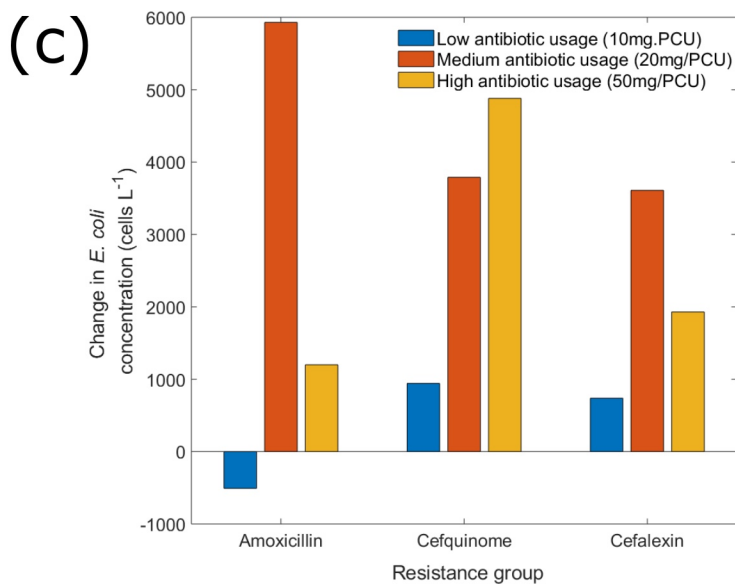

Source: https://www.biorxiv.org/content/biorxiv/early/2022/02/22/2022.02.22.481441.full.pdf
